# Supplementary material for: Electron beam irradiation for the formation of thick Ag film on Ag3PO4
Source: RSC Adv. 2020 Jun 8;10(37):21745–53. doi: 10.1039/d0ra03179h (PMC9054597; doi:10.1039/d0ra03179h)
Supplement: RA-010-D0RA03179H-s001 [file RA-010-D0RA03179H-s001.pdf]

Table S1. Representative Ag clusters from the (110) surface upon four electron irradiation doses (0.125, 0.250, 0.500 and 1.000 e<sup>-</sup>). Ag-Ag distances (Å) and the related  $\rho$  (a.u.) and  $\nabla^2\rho$  (a.u.) are compared to Ag-Ag bonding in Ag bulk.

| System                           | $d_{\text{Ag-Ag}}$ | $\rho$ | $\nabla^2\rho$ |
|----------------------------------|--------------------|--------|----------------|
| Cluster 1 – 0.125 e <sup>-</sup> | 2.845              | 0.230  | 1.572          |
|                                  | 2.744              | 0.274  | 2.346          |
|                                  | 2.845              | 0.230  | 1.572          |
|                                  | 2.744              | 0.274  | 2.346          |
| Cluster 2 – 0.250 e <sup>-</sup> | 2.710              | 0.310  | 2.242          |
|                                  | 2.869              | 0.233  | 1.510          |
|                                  | 2.859              | 0.234  | 1.574          |
|                                  | 2.882              | 0.209  | 1.579          |
| Cluster 3 – 0.500 e <sup>-</sup> | 2.702              | 0.308  | 2.470          |
|                                  | 2.842              | 0.224  | 1.820          |
| Cluster 4 – 1.000 e <sup>-</sup> | 2.837              | 0.242  | 1.719          |
|                                  | 2.822              | 0.264  | 1.454          |
|                                  | 2.739              | 0.283  | 2.351          |
| Metallic Ag                      | 2.880              | 0.218  | 1.592          |

Table S2. Representative O<sub>2</sub> molecules formed in (100) and (111) surfaces upon two electron irradiation doses (0.125 and 0.250 e<sup>-</sup>). O-O distances (Å) and the related  $\rho$  (a.u.) and  $\nabla^2\rho$  (a.u.) are compared to O-O bonding in O<sub>2</sub> gas phase.

| System                       | $d_{\text{O-O}}$ | $\rho$ | $\nabla^2\rho$ |
|------------------------------|------------------|--------|----------------|
| (100) - 0.125 e <sup>-</sup> | 1.380            | 2.308  | -7.575         |
| (111) - 0.250 e <sup>-</sup> | 1.541            | 2.659  | -12.124        |
| Molecular O <sub>2</sub>     | 1.234            | 3.435  | -23.764        |

**0.125e<sup>-</sup>**

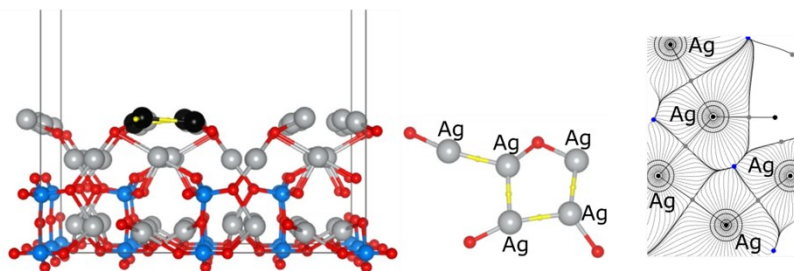

**0.250e<sup>-</sup>**

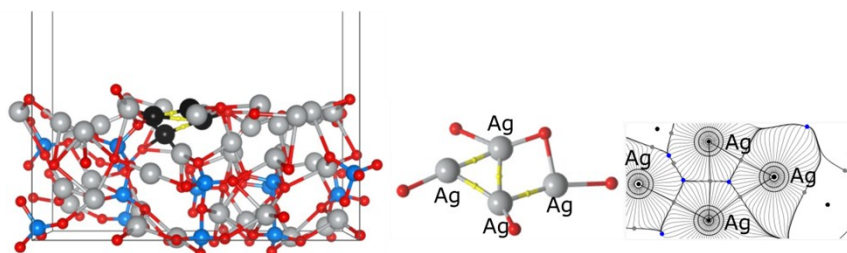

**0.500e<sup>-</sup>**

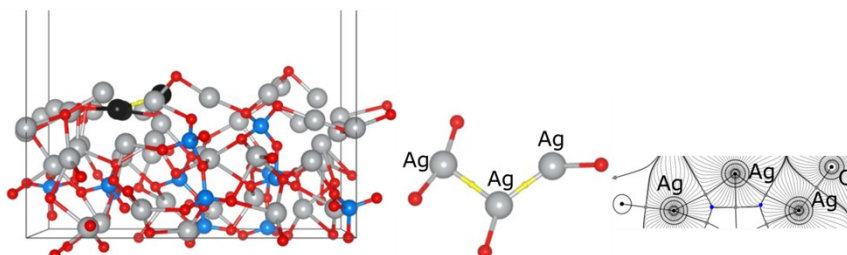

**1.000e<sup>-</sup>**

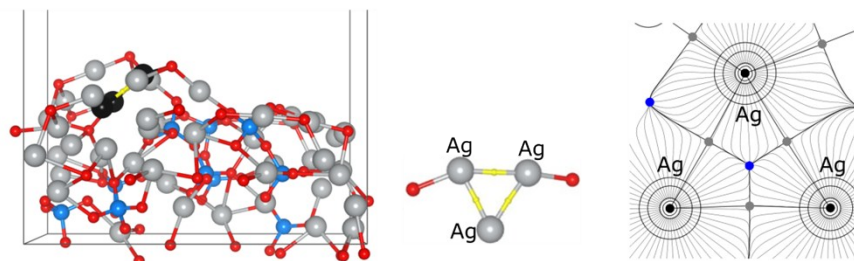

**Ag metallic**

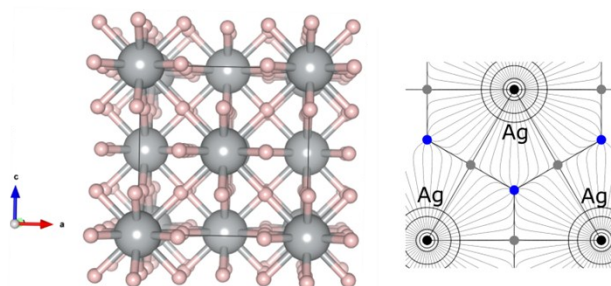

Figure S1. Representative Ag clusters from the (110) surface upon four electron irradiation doses (0.125, 0.250, 0.500 and 1.000 e<sup>-</sup>). Left panels: system lateral views, where Ag, P and O atoms are coloured in grey, blue and red, respectively. The Ag atoms in the selected cluster are in black. Middle panels: top views of the selected Ag clusters. Right panels: illustrative representations of the bonding critical points (BCPs) of the selected Ag clusters.

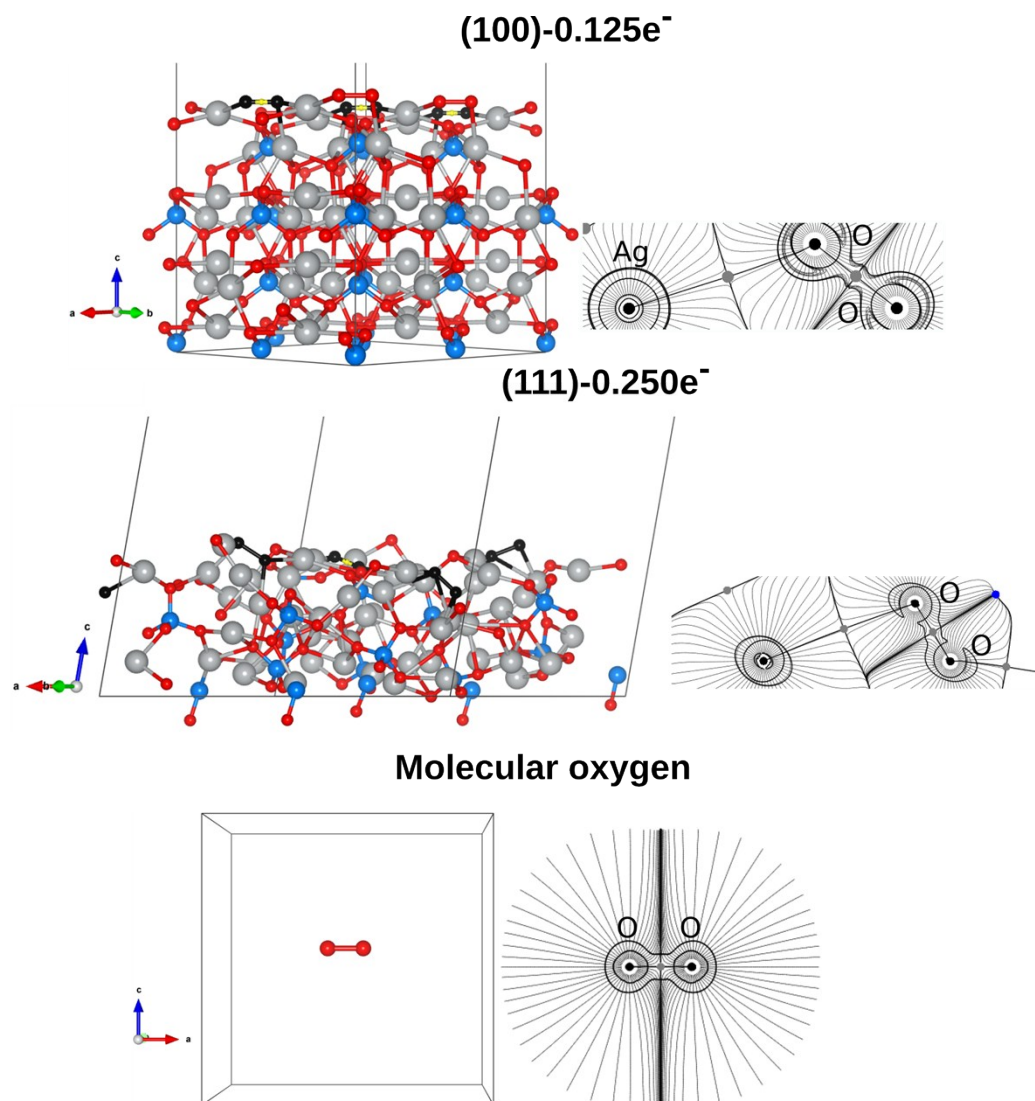

Figure S2. Representative O<sub>2</sub> molecules formed in (100) and (111) surfaces upon two electron irradiation doses (0.125 and 0.250 e<sup>-</sup>). Left panels: system lateral views, where Ag, P and O atoms are coloured in grey, blue and red, respectively. The O atoms in the formed O<sub>2</sub> molecules are in black. Right panels: illustrative representations of the bonding critical points (BCPs) of the selected formed O<sub>2</sub> molecules.
